# Supplementary material for: Mutation Hotspots Found in Bladder Cancer Aid Prediction of Carcinogenic Risk in Normal Urothelium
Source: MDPI journal article supplement (doi:10.3390/ijms24097852), 2023-04-25
Supplement: s1 [file s1]

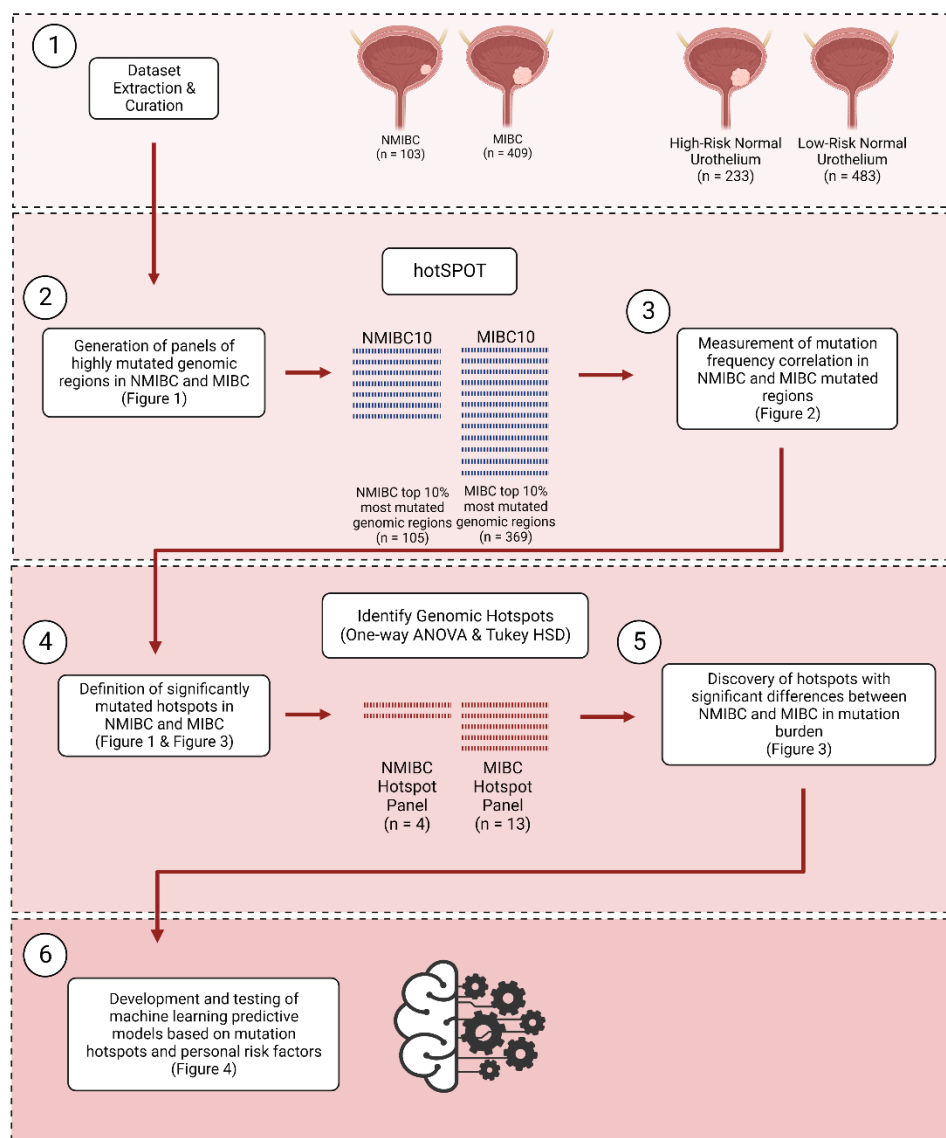

Supplementary Figure S1. Overview of study methodology.

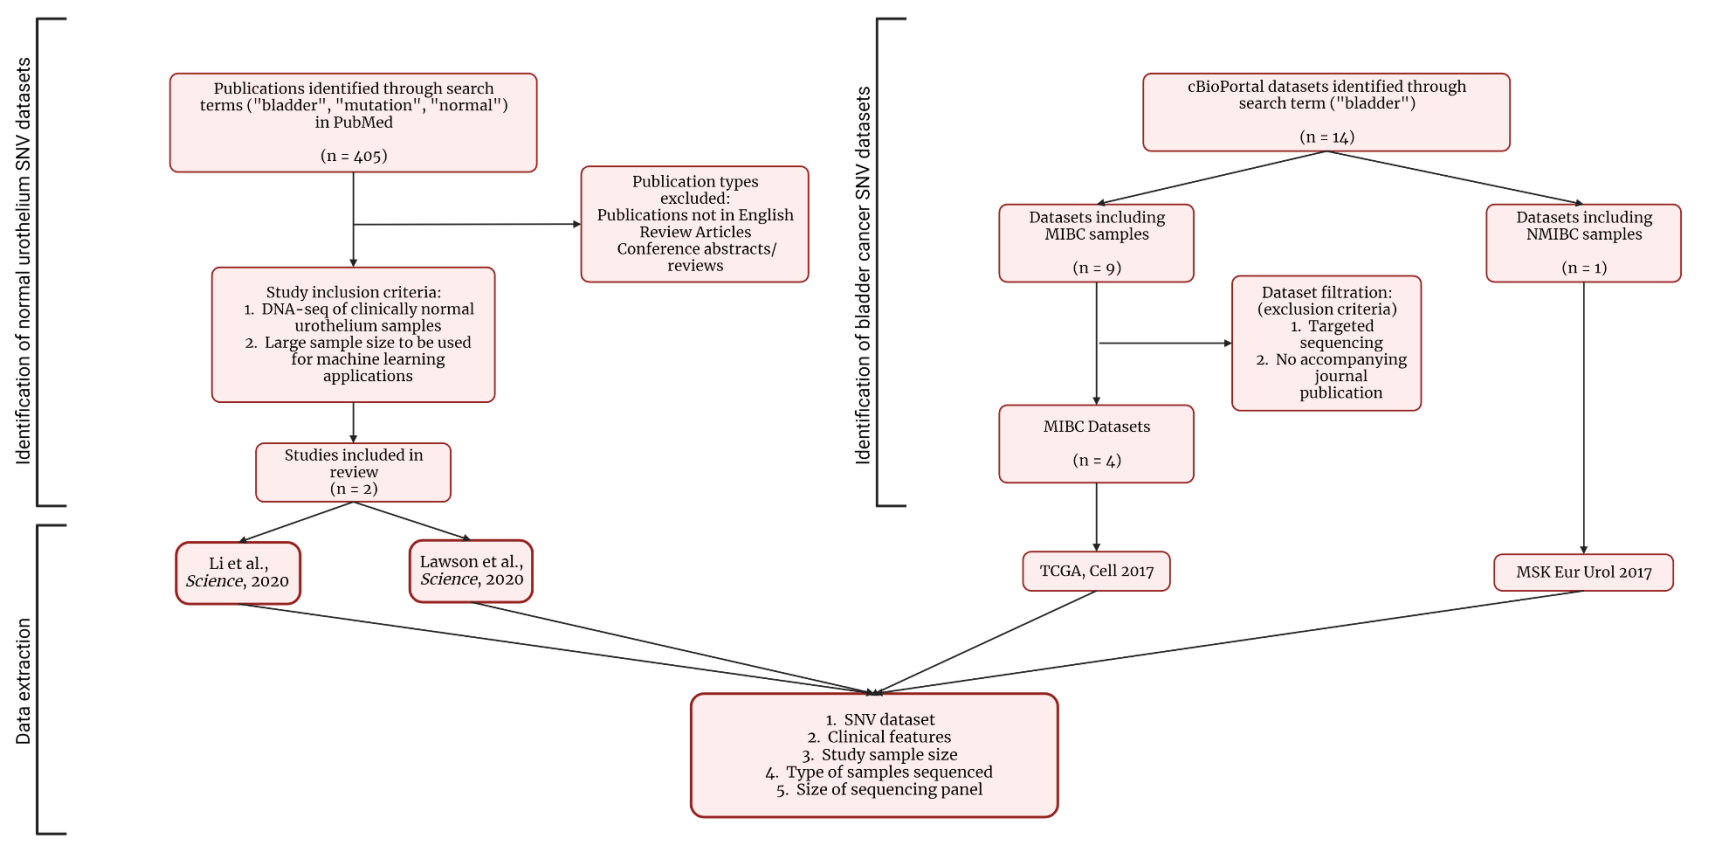

Supplementary Figure S2. Bladder cancer and normal urothelium dataset selection.

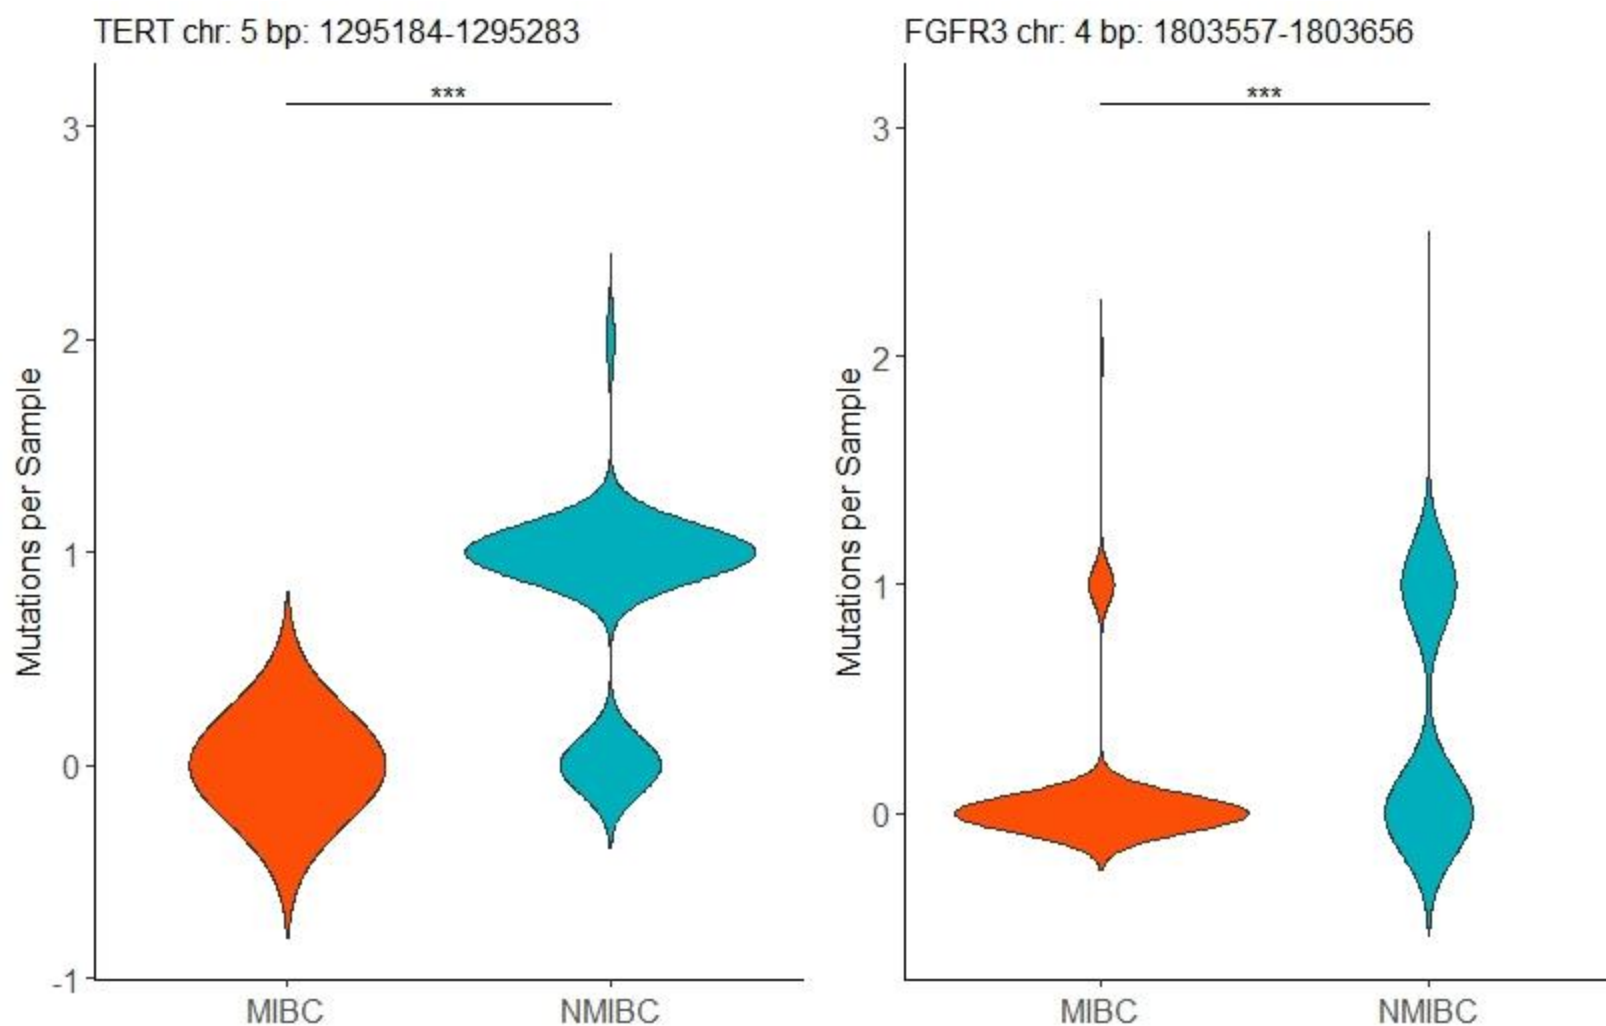

Supplementary Figure S3. Genomic segments with significantly higher mutation burden in NMIBC samples. Significance based on Wilcoxon signed-rank test. (\*\*\*,  $p < 0.001$ ).

| Sample Type                        | Number of Samples | Sequencing Panel           | Dataset Location                             |
|------------------------------------|-------------------|----------------------------|----------------------------------------------|
| Muscle Invasive Bladder Cancer     | 412               | WES                        | cBioPortal (TCGA, Cell 2017) PMID: 28988769  |
| Non-Muscle Invasive Bladder Cancer | 103               | IMPACT targeted sequencing | cBioPortal (MSK Eur Urol 2017) PMID:28583311 |
| Muscle Invasive Bladder Cancer     | 126               | WES                        | PMID: 33004515                               |
| Low-Risk Normal Urothelium         | 483               | WES                        | PMID: 33004514                               |
| High-Risk Normal Urothelium        | 72                | WES                        | PMID: 33004514                               |
| High-Risk Normal Urothelium        | 161               | WES                        | PMID: 33004515                               |

Supplementary Table S1: Summary of publicly available datasets.

| lowerbound | upperbound | chromosome | gene   |
|------------|------------|------------|--------|
| 1803519    | 1803618    | 4          | FGFR3  |
| 178936038  | 178936137  | 3          | PIK3CA |
| 7577047    | 7577146    | 17         | TP53   |
| 37868156   | 37868255   | 17         | ERBB2  |

Supplementary Table S2: Genomic coordinates of NMIBC hotspot panel

| lowerbound | upperbound | chromosome | gene   |
|------------|------------|------------|--------|
| 7577045    | 7577144    | 17         | TP53   |
| 178936040  | 178936139  | 3          | PIK3CA |
| 7577494    | 7577593    | 17         | TP53   |
| 1803557    | 1803656    | 4          | FGFR3  |
| 7578380    | 7578479    | 17         | TP53   |
| 7578183    | 7578282    | 17         | TP53   |
| 37868159   | 37868258   | 17         | ERBB2  |
| 36651972   | 36652071   | 6          | CDKN1A |
| 1806049    | 1806148    | 4          | FGFR3  |
| 21971025   | 21971124   | 9          | CDKN2A |
| 178098876  | 178098975  | 2          | NFE2L2 |
| 7578435    | 7578534    | 17         | TP53   |
| 44922703   | 44922802   | X          | KDM6A  |

Supplementary Table S3: Genomic coordinates of MIBC hotspot panel
